# Supplementary material
Source: Springer Nature journal article supplement (https://www.springermedizin.de/resource/supplementary/12985_2010_1090_MOESM5_ESM.pdf/9609118)
Supplement: MOESM5 [file 9609118]

Query location shown as colored bar i. Nucleotide alignment table for query 071002-R4\_AD3\_17. C1.ab1\_1017\_0\_1017\_ABI. Shows alignment with HCV genome regions E1, E2, NS2, NS3, NS4, NS4B, NS5A, NS5B, NS5C, and 3'UTR.

Sequence alignment showing HCV genome regions: NS3, NS4, NS4B, NS5A, NS5B, NS5C, and 3'UTR. Includes amino acid translation and a reference sequence for HCV Complete DNA, 471 sequences\*.

Query Length: 3037

H77 Location: genome: 93537 964 reverse complement

Alignment used: HCV Complete DNA, 471 sequences\*

\* Matched with different sequences from all over the world HCV genotypes (1a, 1b, 1c, 2a, 2b, 3a, 4a, 4d, 5a, 6a, 6b, 6c, 6d, 6e, 6f, 6g, 6h, 6i, 6j, 6k, 6l, 6m, 6n, 6o, 6p, 6q)

A

Nucleotide alignment table for query 081201-22\_K05\_17. Ac2.ab1\_126\_0\_126\_ABI. Shows alignment with HCV genome regions E1, E2, NS2, NS3, NS4, NS4B, NS5A, NS5B, NS5C, and 3'UTR.

Query: 081201-22\_K05\_17. Ac2.ab1\_126\_0\_126\_ABI

Query Length: 128

H77 Location: genome: 45087 4636 reverse complement

Alignment used: HCV Complete DNA, 471 sequences\*

\* Matched with different sequences from all over the world HCV genotypes (1a, 1b, 2a, 2b, 3a, 4a, 4d, 5a, 6a, 6b, 6d, 6e, 6f, 6g, 6h, 6i, 6j, 6k, 6l, 6m, 6n, 6o, 6p, 6q)

B

Query location shown as colored bar in map.

Nucleotide alignment table for query 081201-22\_I03\_12-F.ab1.68. Shows alignment with HCV genome regions E1, E2, NS2, NS3, NS4, NS4B, NS5A, NS5B, NS5C, and 3'UTR.

Query: 081201-22\_I03\_12-F.ab1.68

Query Length: 171

H77 Location: genome: 1277 312 reverse complement

Alignment used: HCV Complete DNA, 467 sequences\*

\* Matched with different sequences from all over the world HCV genotypes (1a, 1b, 1c, 2a, 2b, 2c, 2k, 3a, 3b, 3k, 4a, 5a, 6a, 6d, 6e, 6f, 6g, 6h, 6i, 6j, 6k, 6l, 6m, 6n, 6o, 6p, 6q)

C

Query location shown as colored bar in map.

Nucleotide alignment table for query 071002-R4\_AD3\_34. C3.ab1\_855\_0\_855\_ABI. Shows alignment with HCV genome regions E1, E2, NS2, NS3, NS4, NS4B, NS5A, NS5B, NS5C, and 3'UTR.

Query: 071002-R4\_AD3\_34. C3.ab1\_855\_0\_855\_ABI

Query Length: 872

H77 Location: genome: 92487 964 reverse complement

Alignment used: HCV Complete DNA, 471 sequences\*

\* Matched with different sequences from all over the world HCV genotypes (1a, 1b, 1c, 2a, 2b, 2c, 2k, 3a, 3b, 3d, 4a, 4d, 5a, 6a, 6b, 6c, 6d, 6e, 6f, 6g, 6h, 6i, 6j, 6k, 6l, 6m, 6n, 6o, 6p, 6q)
